# Supplementary material
Source: Springer Nature journal article supplement (https://www.springermedizin.de/resource/supplementary/12957_2011_914_MOESM4_ESM.pdf/9565818)

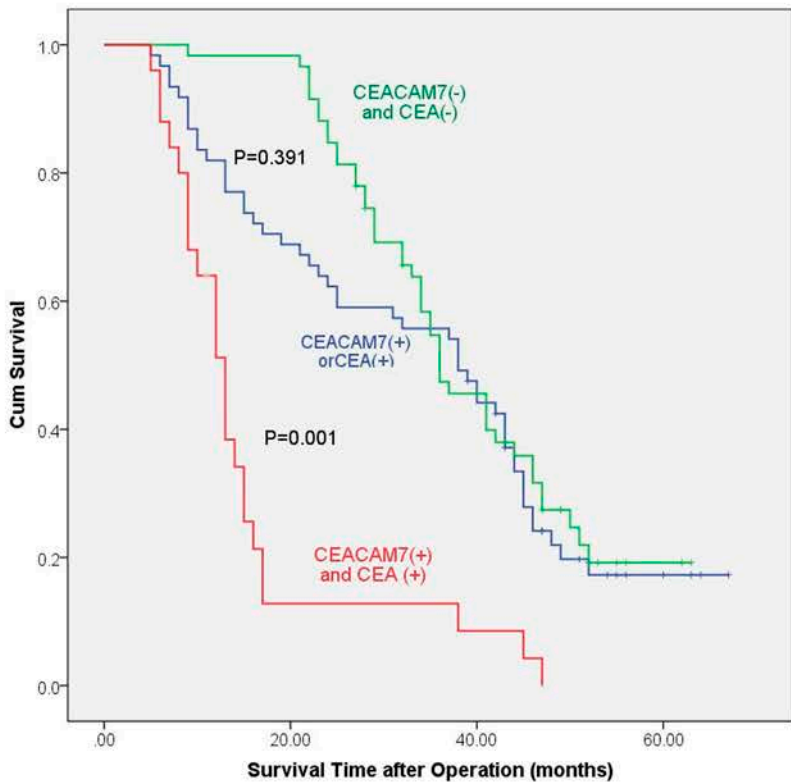

Supplement: MOESM4 [file 9565818]
